# Supplementary material for: Encapsulating organic guest cations in anionic MOFs that exhibit multi-responsive photochromism and photocontrolled luminescence
Source: Royal Society of Chemistry journal article supplement (doi:10.1039/d0ce01545h), 2020-12-09
Supplement: d0ce01545h1.pdf [file d0ce01545h1.pdf]

# Encapsulating organic guest cations in anionic MOFs that exhibit multi-responsive photochromism and photocontrolled luminescence

Jian-Jun Liu,<sup>\*a</sup> Shu-Biao Xia,<sup>a</sup> Dan Liu,<sup>a</sup> Jia-Ming Liu,<sup>b</sup> Fei-Xiang Cheng<sup>\*a</sup>

<sup>a</sup> College of Chemistry and Environmental Science, Qujing Normal University,  
655011, China

<sup>b</sup> School of Metallurgy Engineering, Jiangxi University of Science and Technology,  
Ganzhou 341000, China

Email: [jjliu302@163.com](mailto:jjliu302@163.com) (J.-J. Liu); [chengfx2010@163.com](mailto:chengfx2010@163.com) (F.-X. Cheng)

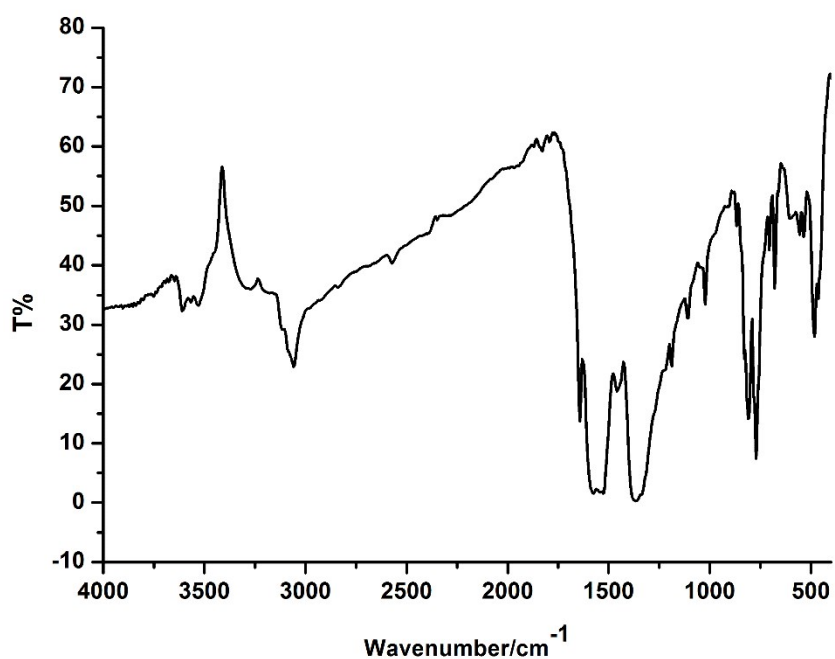

Fig. S1. IR spectrum of compound 1.

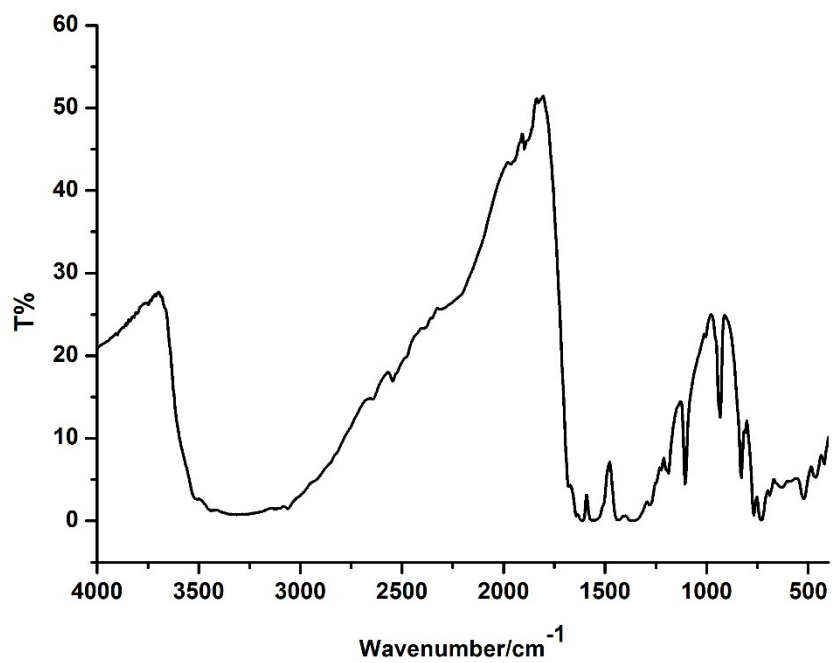

Fig. S2. IR spectrum of compound 2.

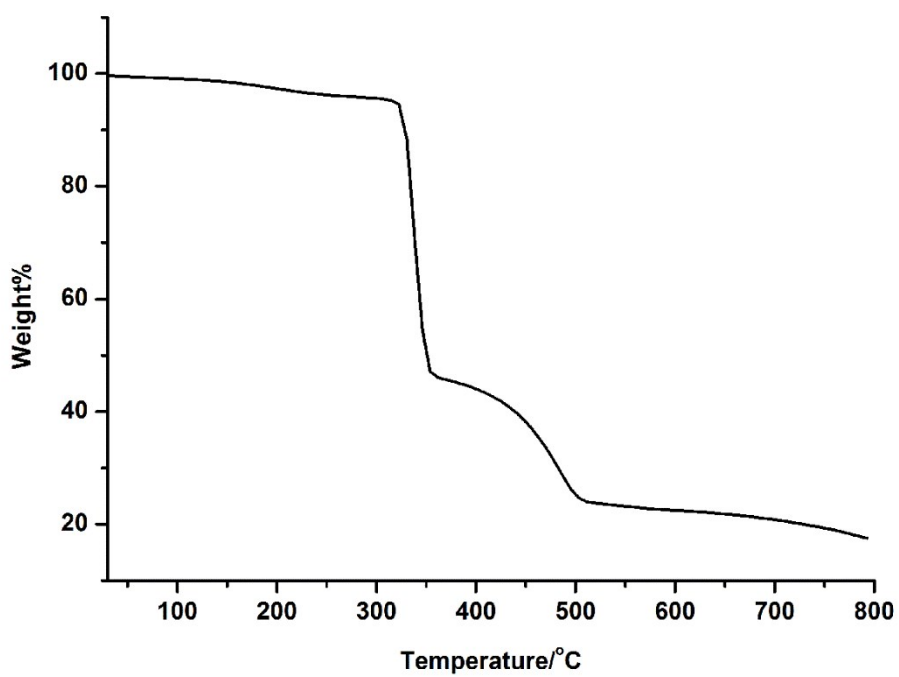

Fig. S3. TGA curve of compound 1.

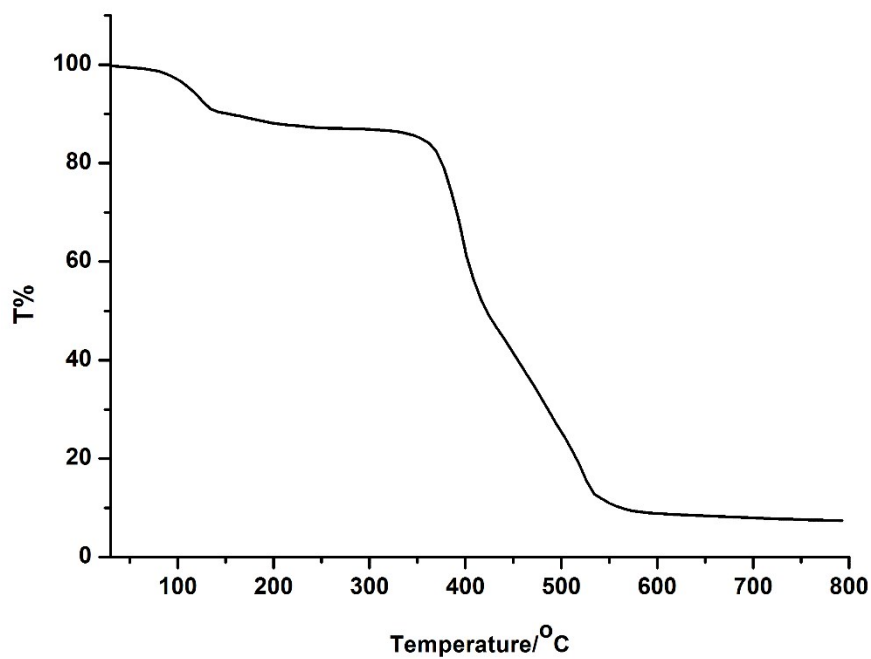

Fig. S4. TGA curve of compound 2.

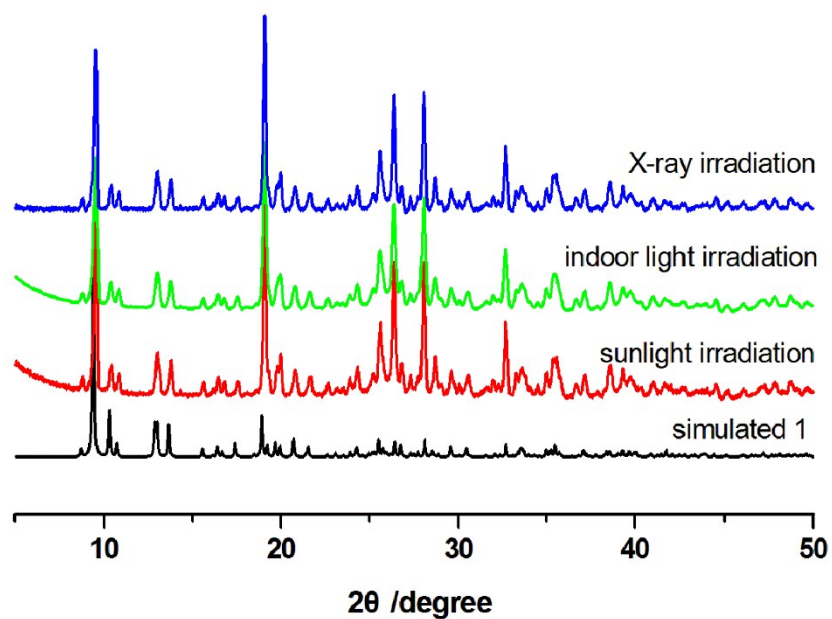

Fig. S5. PXRD patterns of compound 1 before and after irradiation.

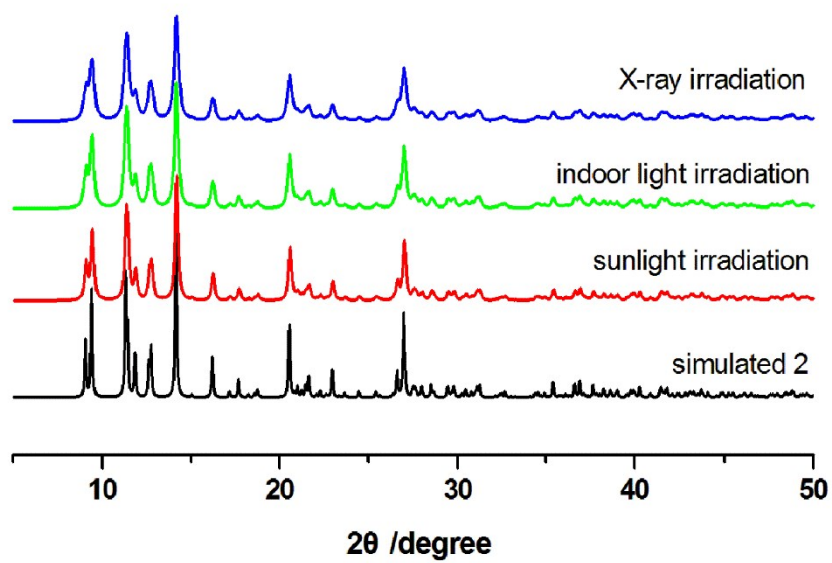

Fig. S6. PXRD patterns of compound 2 before and after irradiation.

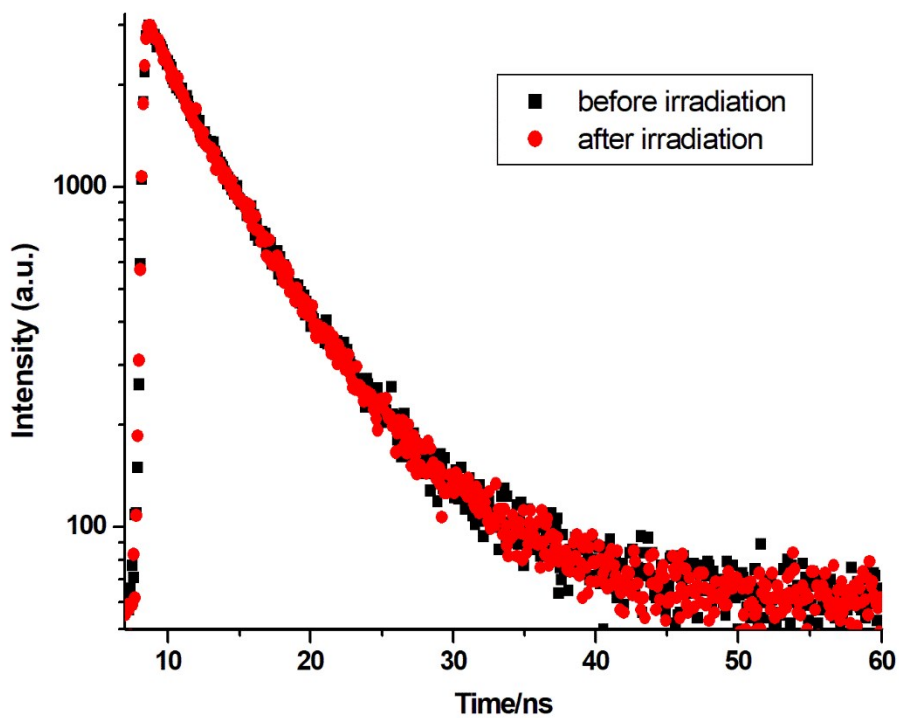

Fig. S7. Fluorescence lifetime decay curves of compound 1 before and after irradiation.

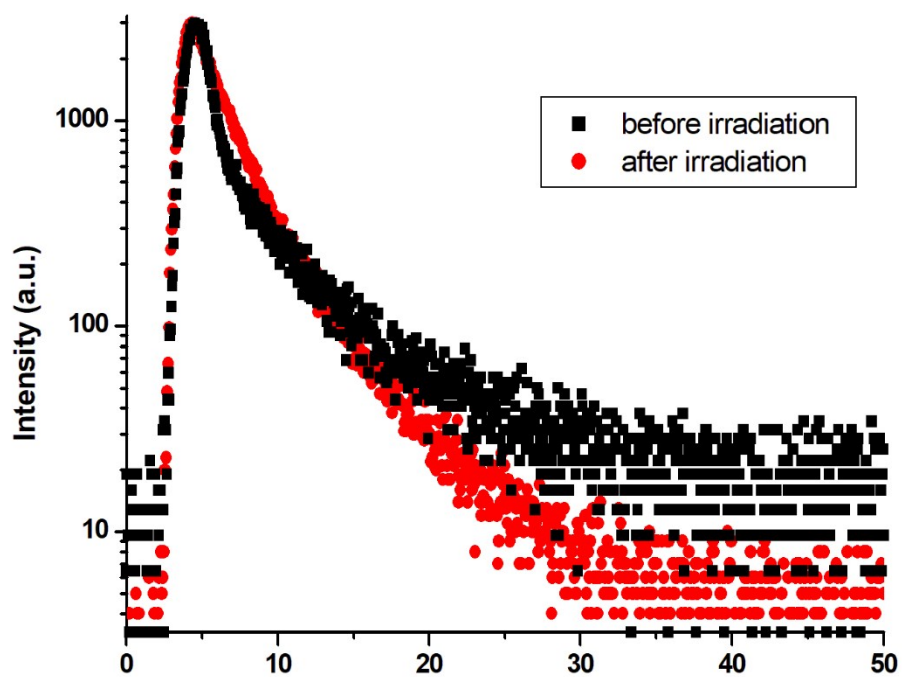

Fig. S8. Fluorescence lifetime decay curves of compound 2 before and after irradiation.

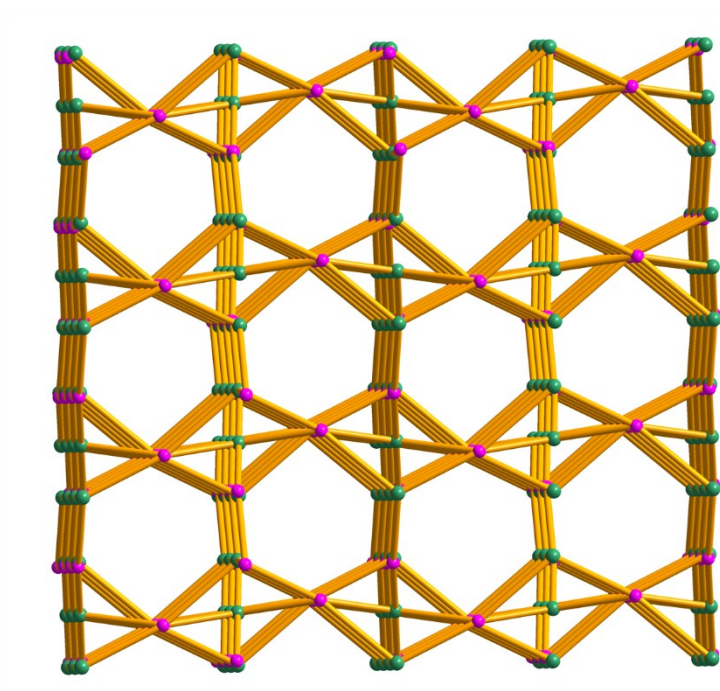

Fig. S9. Schematic representations of the (3,6)-connected framework in 1.

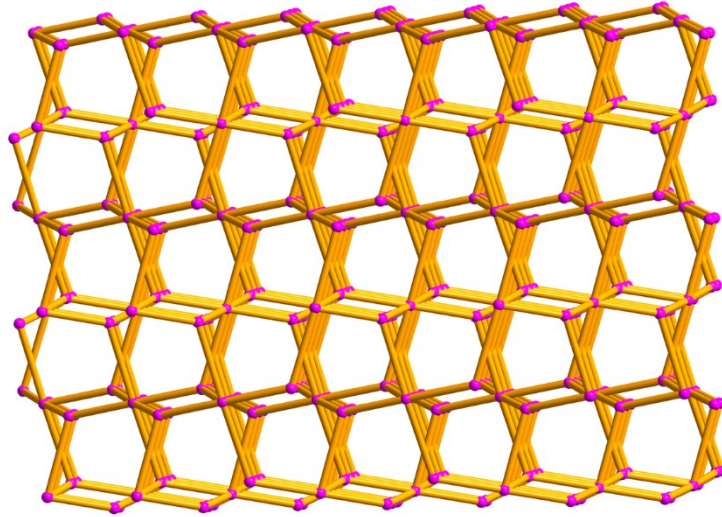

Fig. S10. Schematic representations of the (4,5,6)-connected framework in 2.

### Calculation Method

First-principle calculations were performed by the density functional theory (DFT) using the Vienna Ab-initio Simulation Package (VASP) package [1]. The generalized gradient approximation (GGA) with the Perdew–Burke–Ernzerhof (PBE) functional were used to describe the electronic exchange and correlation effects [2-4]. Uniform G-centered k-points meshes with a resolution of  $2\pi \cdot 0.04 \text{ \AA}^{-1}$  and Methfessel-Paxton electronic smearing were adopted for the integration in the Brillouin zone for geometric optimization. The simulation was run with a cutoff energy of 500 eV throughout the computations. These settings ensure convergence of the total energies to within 1 meV per atom. Structure relaxation proceeded until all forces on atoms were less than  $1 \text{ meV \AA}^{-1}$  and the total stress tensor was within 0.01 GPa of the target value.

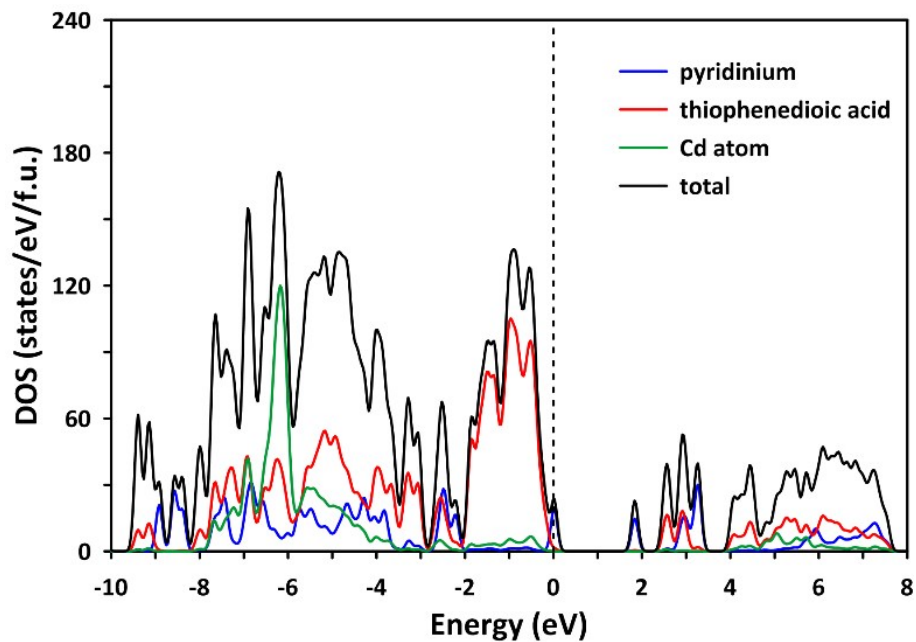

Fig. S11. Total and partial electronic density of states of compound 1.

## References

- [1] G. Kresse and J. Furthmüller, *Comput. Mater. Sci.*, 1996, 6, 15–50.
- [2] J. P. Perdew, K. Burke and M. Ernzerhof, *Phys. Rev. Lett.*, 1996, 77, 3865–3868.
- [3] P. E. Blöchl, *Phys. Rev. B: Condens. Matter Mater. Phys.*, 1994, 50, 17953–17979.
- [4] G. Kresse and D. Joubert, *Phys. Rev. B: Condens. Matter Mater. Phys.*, 1999, 59, 1758.
